# Supplementary material for: Resetting the ligand binding site of placental protein 13/galectin-13 recovers its ability to bind lactose
Source: Oxford University Press journal article supplement (doi:10.1042/bsr20181787), 2018-11-09

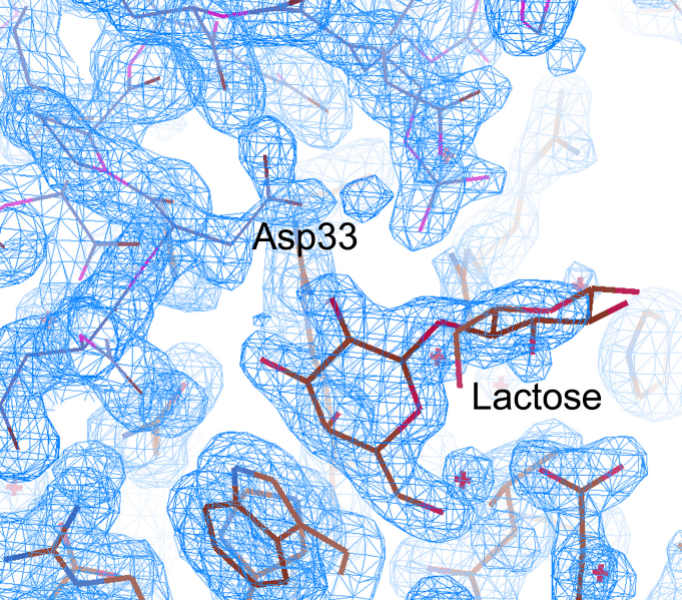

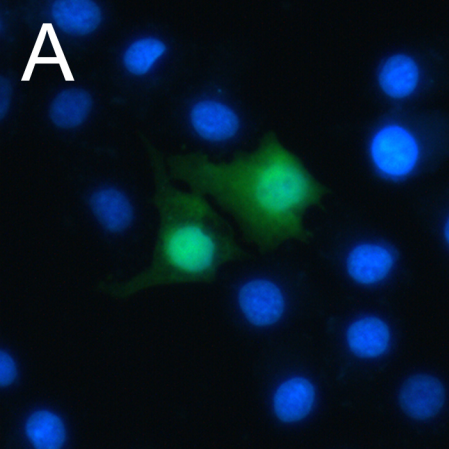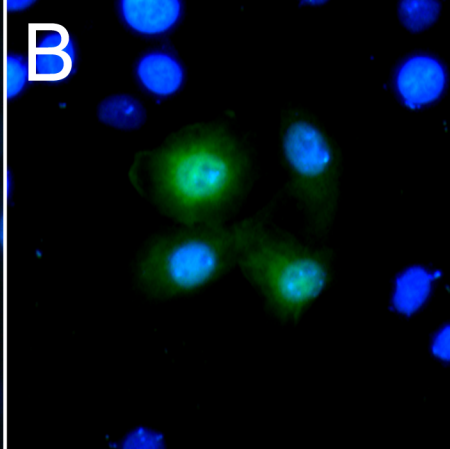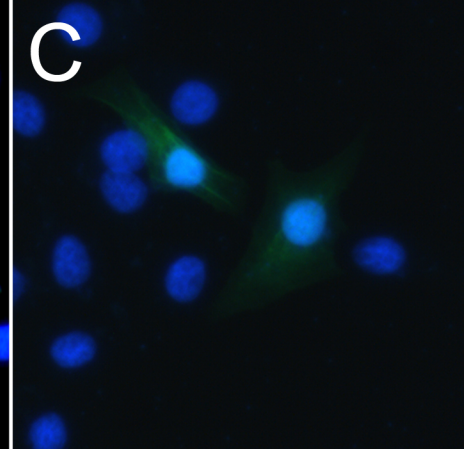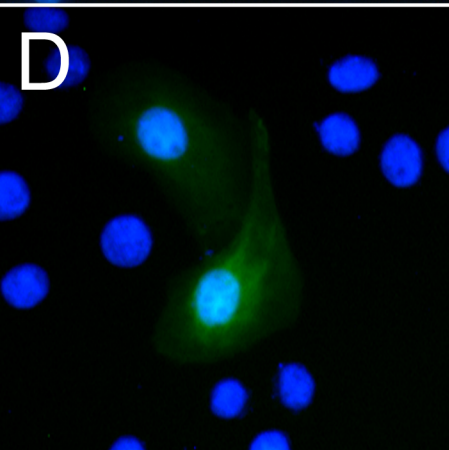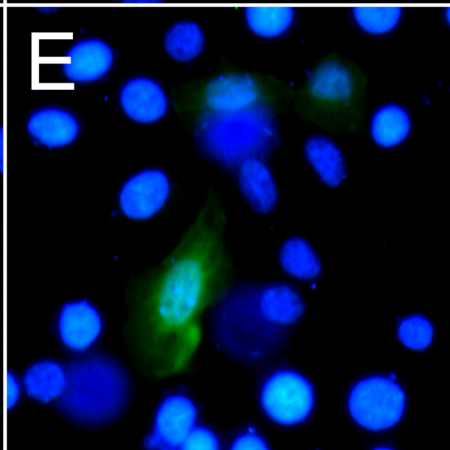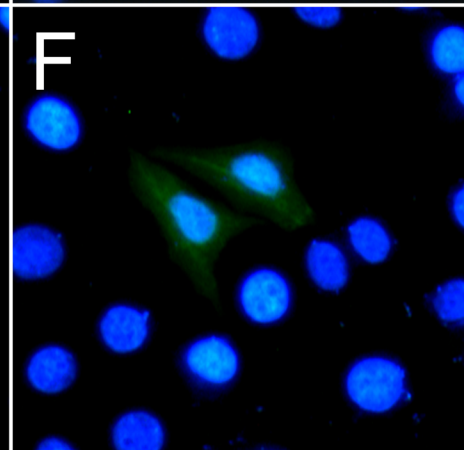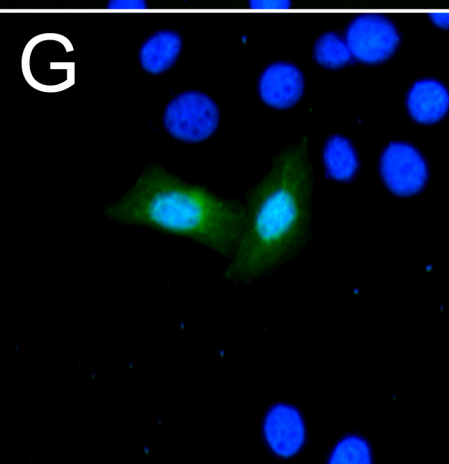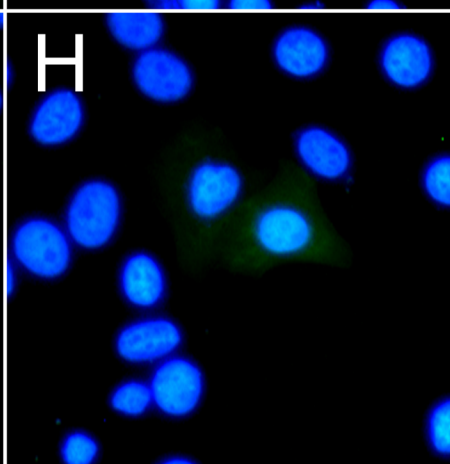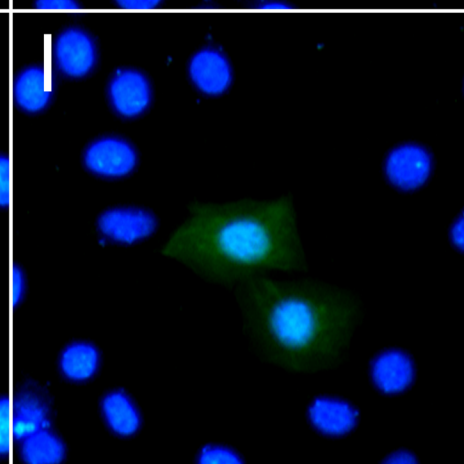

Supplement: bsr20181787_supp1.pdf [file bsr20181787_supp1.pdf]
